# Supplementary material for: Catalytic synthesis of renewable 2-methylfuran from furfural
Source: Royal Society of Chemistry journal article supplement (doi:10.1039/d4su00229f), 2024-01-01
Supplement: d4su00229f1.pdf [file d4su00229f1.pdf]

## Supporting information

# Catalytic Synthesis of Renewable 2-Methylfuran from Furfural

Yuanyuan Han <sup>a</sup>, Xing Zhang <sup>b</sup>, Wei Wang <sup>a</sup>, Shaobo Guo <sup>a</sup>, Xiaohui Ji <sup>a, \*</sup>, Guangyi Li <sup>b, \*</sup>

<sup>a</sup> Shaanxi Key Laboratory of Catalysis, School of Chemical & Environment Science, Shaanxi

University of Technology, Hanzhong, Shaanxi 723001, P. R. China;

<sup>b</sup> CAS Key Laboratory of Science and Technology on Applied Catalysis, Dalian Institute of  
Chemical Physics, Chinese Academy of Sciences, Dalian 116023, China

\* E-mail: [jxiaohui@snut.edu.cn](mailto:jxiaohui@snut.edu.cn) (X. Ji); [lgy2010@dicp.ac.cn](mailto:lgy2010@dicp.ac.cn) (G. Li)

Table S1. Comparison of catalytic performance of Co/CoO<sub>x</sub> catalyst and other reported catalysts in furfural selective hydrodeoxygenation.

| Entry | Catalyst                         | T(°C)            | 2-MF yield (%) | Time (h)                                                                  | Furfural to catalyst ratio | Ref. |
|-------|----------------------------------|------------------|----------------|---------------------------------------------------------------------------|----------------------------|------|
| 1     | Cu-Ni/TiO <sub>2</sub>           | 200              | 84.5           | 0.87 g <sub>FFR</sub> h <sup>-1</sup> g <sub>catalyst</sub> <sup>-1</sup> |                            | 1    |
| 2     | Co/MoO <sub>3</sub>              | 250              | 93             | 0.10 g <sub>FFR</sub> h <sup>-1</sup> g <sub>catalyst</sub> <sup>-1</sup> |                            | 2    |
| 3     | 4wt %Pd-1wt %Ru/TiO <sub>2</sub> | Room temperature | 51.5           | 2                                                                         | 10:1                       | 3    |
| 4     | Ru/C                             | 180              | 76             | 10                                                                        | 2.4:1                      | 4    |
| 5     | Ir/C                             | 220              | 95             | 5                                                                         | 10:1                       | 5    |

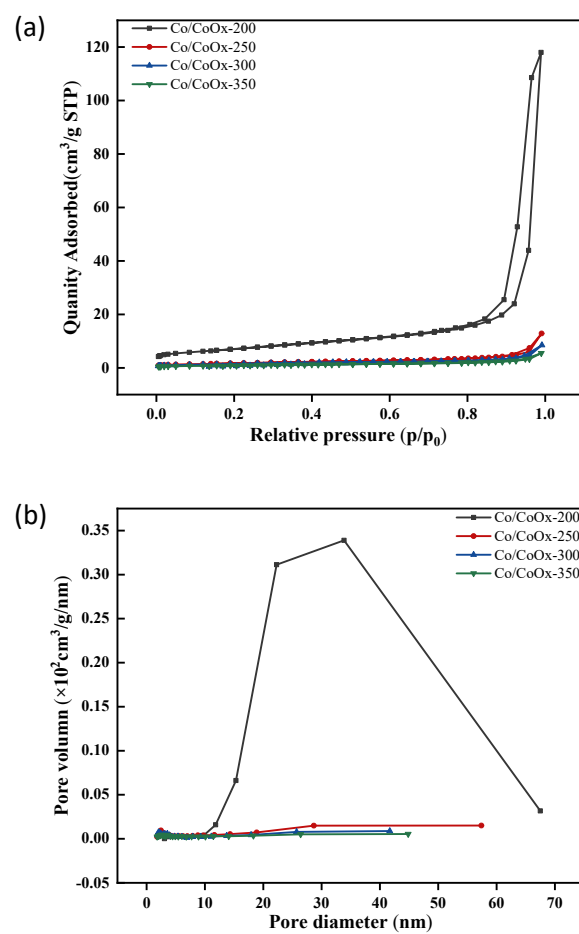

**Fig. S1.** Textural properties of CoO/CoO<sub>x</sub> at different reduction temperatures.

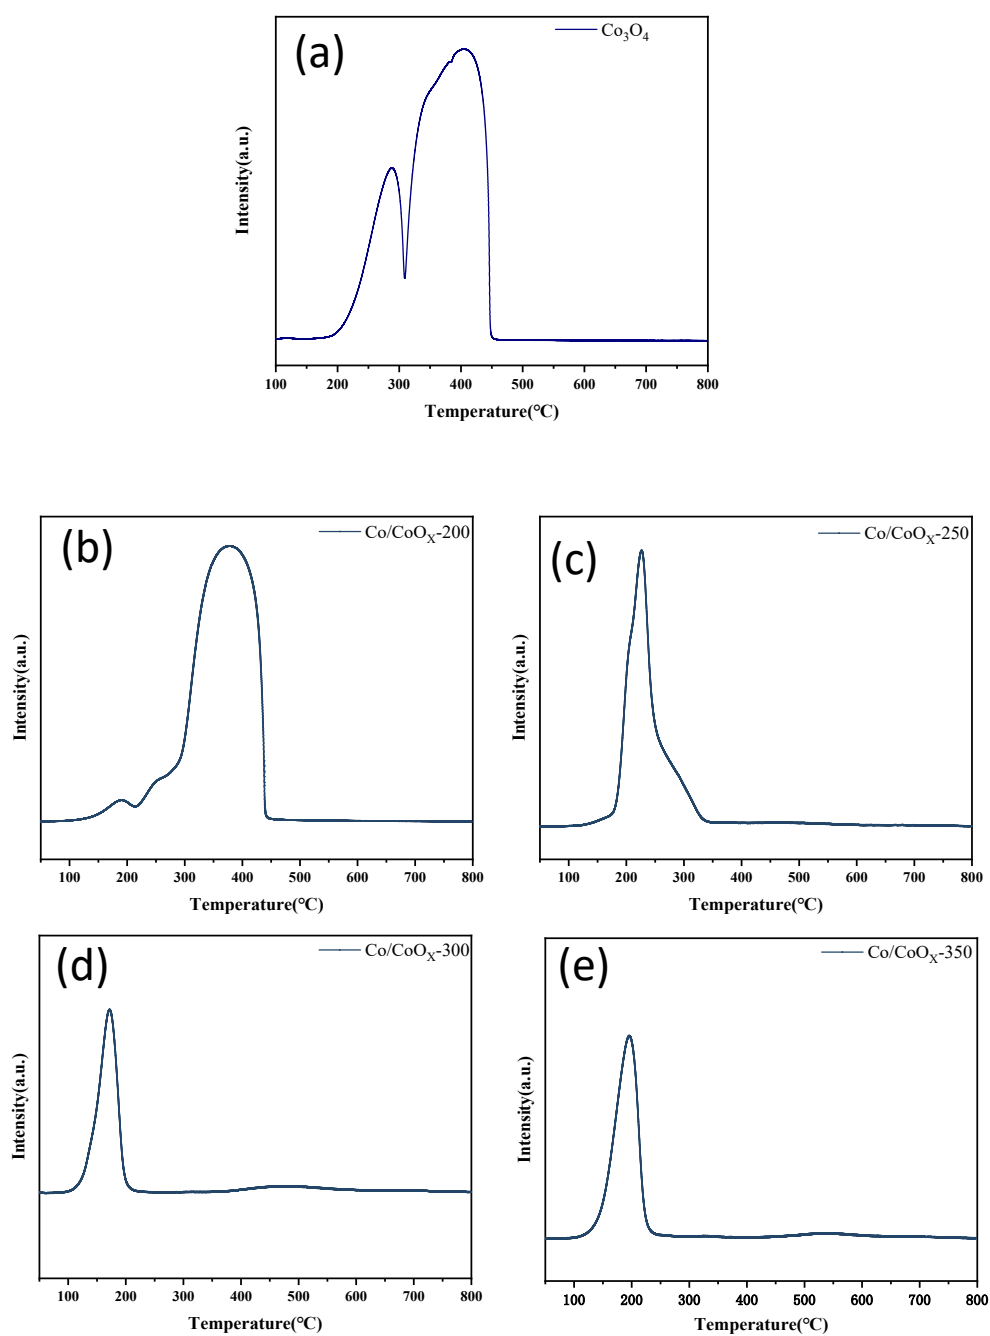

**Fig. S2.** (a) H<sub>2</sub>-TPR spectra of Co<sub>3</sub>O<sub>4</sub> catalysts; (b-e) H<sub>2</sub>-TPR spectra of Co/CoO<sub>x</sub> catalysts at different reduction temperatures.

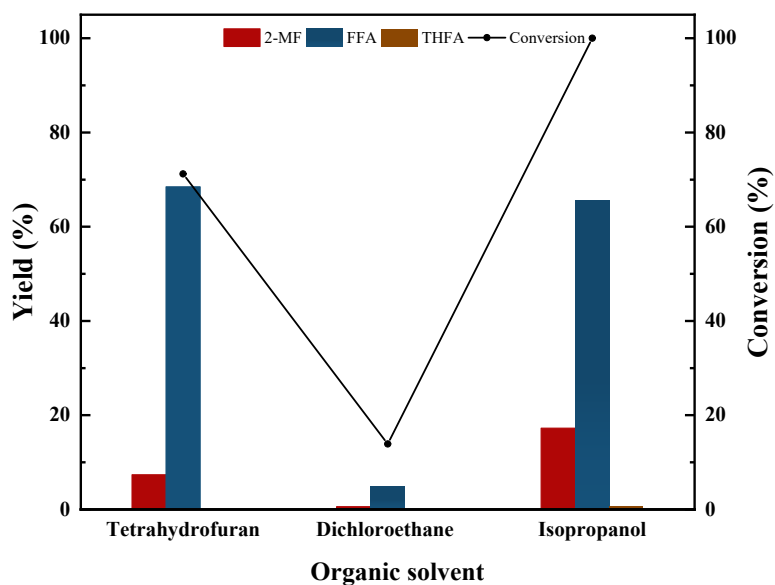

**Fig. S3.** Effect of organic solvent on conversion and yield of furfural selective hydrodeoxygenation with Co/CoO<sub>x</sub> catalysts.

Reaction conditions: furfural 1 g, organic solvent 20 mL, catalyst 100 mg, temperature 130 °C, stirring speed 700 rpm, H<sub>2</sub> pressure 2 MPa, time 2 h. 2-MF: 2-methylfuran, FFA: furfuryl alcohol, THFA: tetrahydrofurfuryl alcohol.

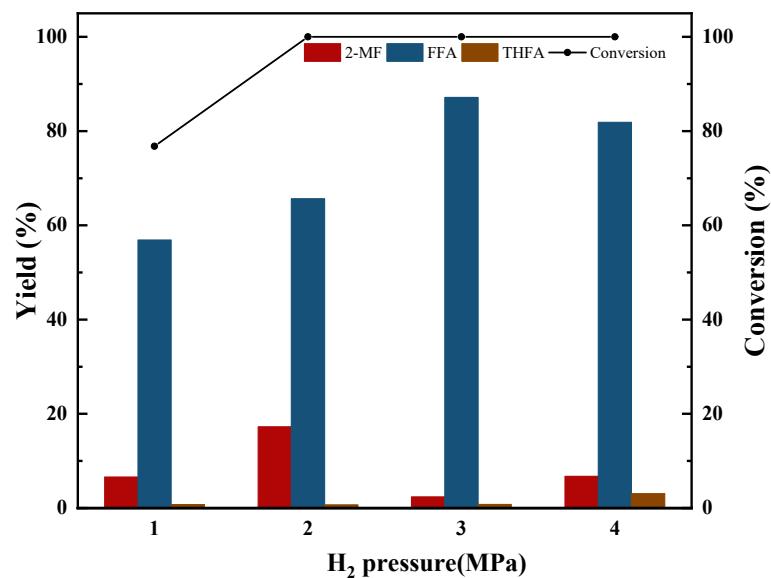

**Fig. S4.** Effect of H<sub>2</sub> pressure on the conversion and yield of furfural selective hydrodeoxygenation with Co/CoO<sub>x</sub>-300 catalyst.

Reaction conditions: furfural 1 g, isopropyl alcohol 20 mL, catalyst 100 mg, temperature 130 °C, stirring speed 700 rpm, time 2 h. 2-MF: 2-methylfuran, FFA: furfuryl alcohol, THFA: tetrahydrofurfuryl alcohol.

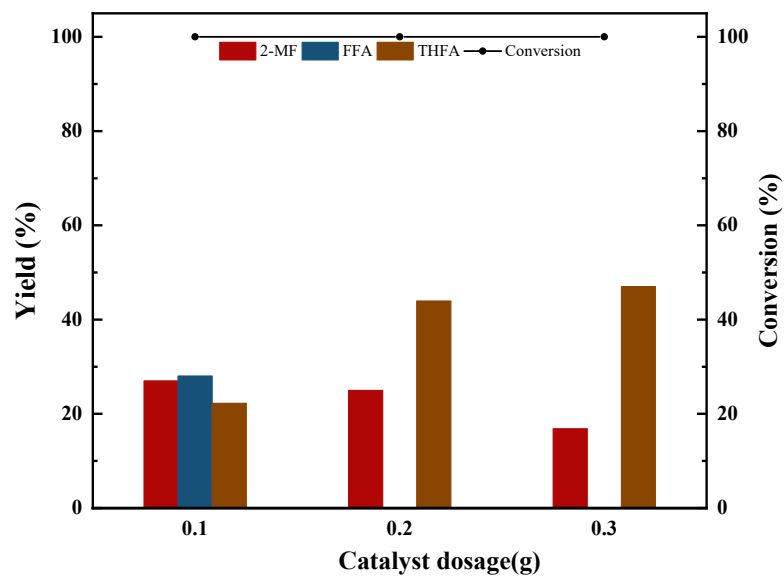

**Fig. S5.** Effect of Co/CoO<sub>x</sub>-300 catalyst dosage on the conversion and yield of furfural selective hydrodeoxygenation.

Reaction conditions: furfural 1 g, isopropyl alcohol 20 mL, temperature 130 °C, stirring speed 700 rpm, H<sub>2</sub> pressure 2 MPa, time 2 h. 2-MF: 2-methylfuran, FFA: furfuryl alcohol, THFA: tetrahydrofurfuryl alcohol.

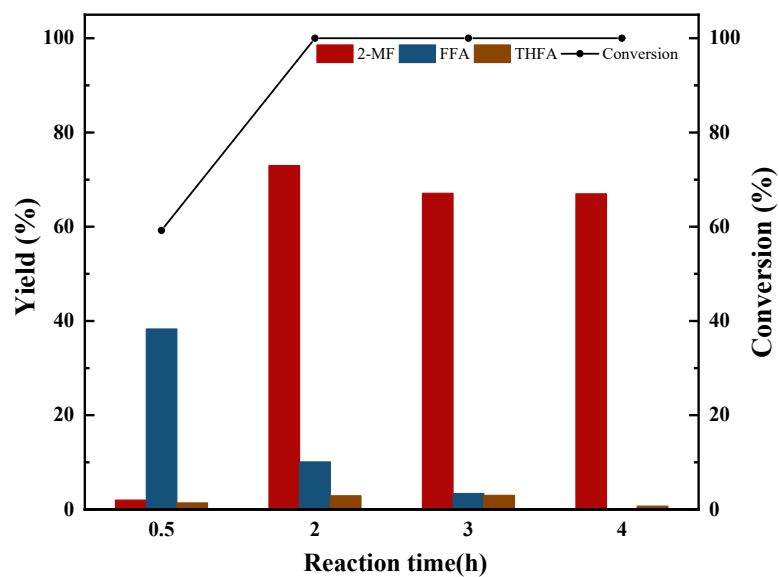

**Fig. S6.** Effect of reaction time of Co/CoO<sub>x</sub>-300 catalyst on the conversion and yield of furfural selective hydrodeoxygenation.

Reaction conditions: furfural 1 g, isopropyl alcohol 40 mL, catalyst 200 mg, stabilizer dosage 0.75ppm, stirring speed 700 rpm, H<sub>2</sub> pressure 2 MPa, time 2 h. 2-MF: 2-methylfuran, FFA: furfuryl alcohol, THFA: tetrahydrofurfuryl alcohol.



Table S2 Textural properties of the fresh and used catalysts measured by BET method

| Catalysts             | BET surface area (m <sup>2</sup> /g) | Total pore volume (cm <sup>3</sup> /g) |
|-----------------------|--------------------------------------|----------------------------------------|
| Fresh catalysts       | 5.8                                  | 0.0021                                 |
| Used after three runs | 2.2                                  | 0.0011                                 |

Table S3 The atomic ratio of Co atoms with fresh and used catalysts, which was calculated from the hydrogen consumption in H<sub>2</sub>-TPR.

| Catalysts             | Quantity (mmol/g) | Atomic ratio                                  |
|-----------------------|-------------------|-----------------------------------------------|
| Fresh catalysts       | 0.875             | Co <sup>0</sup> :Co <sup>2+</sup> =94.8%:5.2% |
| Used after three runs | 0.229             | Co <sup>0</sup> :Co <sup>2+</sup> =98.6%:1.2% |

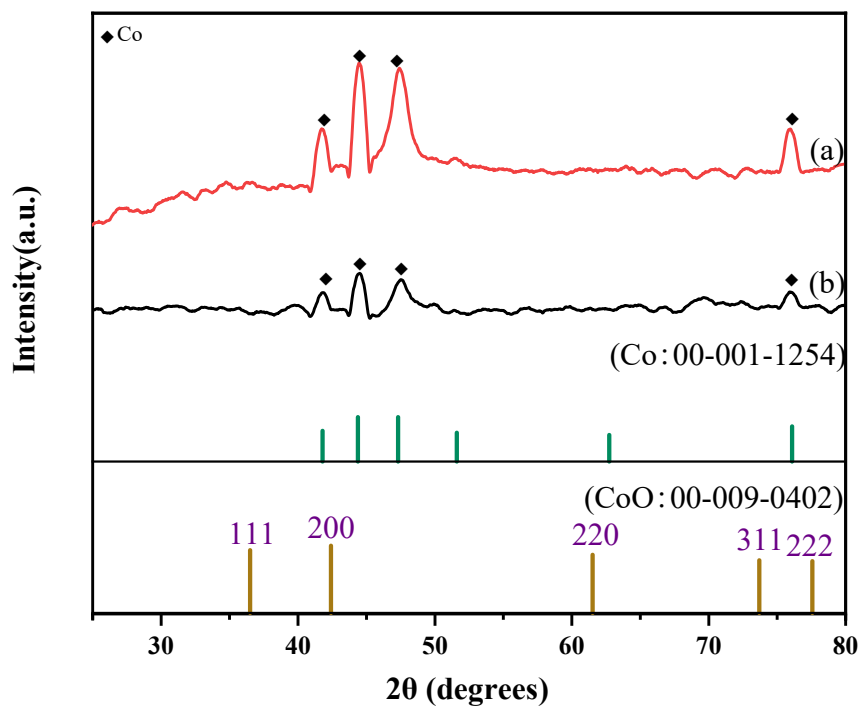

Fig .S7. XRD of fresh and used catalysts (a) fresh Co/CoO<sub>x</sub>-300 and (b) used catalysts Co/CoO<sub>x</sub>-300

## References

- 1 A. Jaswal, P. P. Singh, A. K. Kar, T. Mondal and R. Srivastava, *Fuel Processing Technology*, 2023, 245: 107726.
- 2 Z. Lin, W. Wan, S. Yao and J. G. Chen, *Applied Catalysis B: Environmental*, 2018, 233: 160-166.
- 3 F. Ma, H. Li and J. Jiang, *Chemical Research in Chinese Universities*, 2019, 35(3): 498-503.
- 4 A. O'Driscoll, T. Curtin, W. Y. Hernández, P. Van Der Voort and J. J. Leahy, *Organic Process Research & Development*, 2016, 20(11): 1917-1929.
- 5 O. F. Aldosari, S. Iqbal, P. J. Miedziak, G. L. Brett, D. R. Jones, X. Liu, J. K. Edwards, D. J. Morgan, D. K. Knight and G. J. Hutchings, *Catalysis Science & Technology*, 2016, 6(1): 234-242.
